# Supplementary material for: Median nerve travel and deformation in the transverse carpal tunnel increases with chuck grip force and deviated wrist position
Source: PeerJ journal article supplement (doi:10.7717/peerj.11038), 2021-03-19
Supplement: Questionnaire_S8.pdf [file Questionnaire_S8.pdf]

## Participant Questionnaire:

*The Role of Musculoskeletal Interactions on Wrist and Hand Biomechanics*

---

---

### A. PARTICIPANT IDENTIFICATION (to be completed by the researcher)

**Participant #:** \_\_\_\_\_ **Date:** \_\_\_\_\_

---

---

### B. DEMOGRAPHICS / ANTHROPOMETRICS

**Gender:** \_\_\_\_\_

**Age:** \_\_\_\_\_

**Height:** \_\_\_\_\_

**Weight:** \_\_\_\_\_

---

---

### C. HANDEDNESS

1) Are you right-handed, left-handed or ambidextrous?

**right-handed** ☐      **left-handed** ☐      **ambidextrous** ☐

---

---

### D. HEALTH HISTORY

1) Have you ever had any of the following health conditions and/or treatment protocols performed on you currently and/or in the past? [*please check all that apply*]

- |                                                                  |                                                                                  |
|------------------------------------------------------------------|----------------------------------------------------------------------------------|
| <input type="checkbox"/> Diabetes mellitus                       | <input type="checkbox"/> Radial malunion                                         |
| <input type="checkbox"/> Thyroid condition (e.g. Hypothyroidism) | <input type="checkbox"/> Colles fracture                                         |
| <input type="checkbox"/> Gout                                    | <input type="checkbox"/> Peripheral neuropathy                                   |
| <input type="checkbox"/> Amyloidosis or Sarcoidosis              | <input type="checkbox"/> Carpal tunnel syndrome                                  |
| <input type="checkbox"/> Renal failure or Hemodialysis           | <input type="checkbox"/> Flexor tendinopathy                                     |
| <input type="checkbox"/> Degenerative joint disease              | <input type="checkbox"/> Wrist/hand surgery                                      |
| <input type="checkbox"/> Arthritis of the wrist/hand             | <input type="checkbox"/> Hand pain/tingling/numbness                             |
| <input type="checkbox"/> Corticosteroid injection                | <input type="checkbox"/> Other wrist/hand injury or disorder (not listed above): |
- \_\_\_\_\_
- 
-

2) Are you currently on any medications? **Yes** ☐ **No** ☐

\*\* If **yes**, please list:

---

---

---

## **E. WORK HISTORY**

1) Occupation: \_\_\_\_\_

2) Location of work: \_\_\_\_\_

3) Hours at work per week: \_\_\_\_\_

4) Years at current job: \_\_\_\_\_

5) Typical tasks performed at work:

---

---

---

---

---

6) Have you ever-experienced a work-related wrist or hand injury? **Yes** ☐ **No** ☐

\*\* If **yes**, please elaborate (type of injury, onset, symptoms, and treatment):

---

---

---

---

---

## **F. MUSIC HISTORY**

1) Do you play musical instrument(s)? Yes ☐ No ☐

\*\*\* If yes, please answer the following questions:

a) Type of instrument(s):

---

b) Hour per week spent playing instrument(s):

---

c) Self-reported skill level (e.g. hobby, amateur, professional):

---

---

\*\*\* End \*\*\*
